# Supplementary material for: Characterisation of the Chloroplast Genome of Macrotyloma Species: Comparative Analysis and Phylogenomic Insights
Source: Research Square preprint supplement (doi:10.21203/rs.3.rs-8730534/v1), 2026-02-10
Supplement: Supplementary file 1 [file 0b9599c790e9f319027d0462.xlsx]

## Sheet: TableS1
Table S1. Codon Usage of the Chloroplast Genome of Macrotyloma axillare
Codon	Amino acid	Frequency	Number
GCA	A	14.349	654
GCC	A	6.429	293
GCG	A	5.024	229
GCT	A	23.872	1088
TGC	C	3.796	173
TGT	C	8.25	376
GAC	D	7.548	344
GAT	D	31.529	1437
GAA	E	38.133	1738
GAG	E	11.694	533
TTC	F	19.637	895
TTT	F	42.697	1946
GGA	G	25.364	1156
GGC	G	6.165	281
GGG	G	10.246	467
GGT	G	22.446	1023
CAC	H	5.639	257
CAT	H	20.054	914
ATA	I	30.081	1371
ATC	I	14.591	665
ATT	I	43.662	1990
AAA	K	41.468	1890
AAG	K	13.296	606
CTA	L	13.779	628
CTC	L	6.714	306
CTG	L	6.012	274
CTT	L	22.314	1017
TTA	L	34.425	1569
TTG	L	22.094	1007
ATG	M	22.292	1016
AAC	N	10.554	481
AAT	N	38.528	1756
CCA	P	12.331	562
CCC	P	7.087	323
CCG	P	5.222	238
CCT	P	14.986	683
CAA	Q	28.479	1298
CAG	Q	8.316	379
AGA	R	17.662	805
AGG	R	6.538	298
CGA	R	13.34	608
CGC	R	3.335	152
CGG	R	4.059	185
CGT	R	12.704	579
AGC	S	4.695	214
AGT	S	15.051	686
TCA	S	16.39	747
TCC	S	11.629	530
TCG	S	7.021	320
TCT	S	22.16	1010
ACA	T	15.841	722
ACC	T	7.679	350
ACG	T	4.959	226
ACT	T	21.327	972
GTA	V	19.045	868
GTC	V	5.661	258
GTG	V	6.67	304
GTT	V	20.339	927
TGG	W	18.343	836
TAC	Y	6.648	303
TAT	Y	31.617	1441
TAA	*	3.554	162
TAG	*	2.348	107
TGA	*	2.282	104

## Sheet: TableS2
Table S1. Codon Usage of the Chloroplast Genome of Macrotyloma geocarpum
Codon	Amino acid	Frequency	Number
GCA	A	14.389	656
GCC	A	6.427	293
GCG	A	4.891	223
GCT	A	23.864	1088
TGC	C	3.795	173
TGT	C	8.247	376
GAC	D	7.567	345
GAT	D	31.607	1441
GAA	E	38.078	1736
GAG	E	11.625	530
TTC	F	19.456	887
TTT	F	42.903	1956
GGA	G	25.29	1153
GGC	G	6.295	287
GGG	G	10.156	463
GGT	G	22.439	1023
CAC	H	5.747	262
CAT	H	20.114	917
ATA	I	30.05	1370
ATC	I	14.608	666
ATT	I	43.605	1988
AAA	K	41.17	1877
AAG	K	13.38	610
CTA	L	13.884	633
CTC	L	6.646	303
CTG	L	6.054	276
CTT	L	22.351	1019
TTA	L	34.393	1568
TTG	L	21.956	1001
ATG	M	22.373	1020
AAC	N	10.463	477
AAT	N	38.429	1752
CCA	P	12.327	562
CCC	P	7.085	323
CCG	P	5.155	235
CCT	P	14.937	681
CAA	Q	28.668	1307
CAG	Q	8.203	374
AGA	R	17.767	810
AGG	R	6.58	300
CGA	R	13.336	608
CGC	R	3.224	147
CGG	R	4.167	190
CGT	R	12.722	580
AGC	S	4.738	216
AGT	S	15.047	686
TCA	S	16.56	755
TCC	S	11.713	534
TCG	S	6.931	316
TCT	S	22	1003
ACA	T	16.012	730
ACC	T	7.765	354
ACG	T	4.913	224
ACT	T	21.101	962
GTA	V	18.929	863
GTC	V	5.703	260
GTG	V	6.756	308
GTT	V	20.421	931
TGG	W	18.337	836
TAC	Y	6.536	298
TAT	Y	31.892	1454
TAA	*	3.619	165
TAG	*	2.303	105

## Sheet: TableS3
Table S1. Codon usage of the Chloroplast Genome of Macrotyloma uniflorum
Codon	Amino acid	Frequency	Number
GCA	A	14.479	656
GCC	A	6.467	293
GCG	A	4.966	225
GCT	A	23.969	1086
TGC	C	3.796	172
TGT	C	8.21	372
GAC	D	7.548	342
GAT	D	31.694	1436
GAA	E	38.227	1732
GAG	E	11.72	531
TTC	F	19.489	883
TTT	F	42.553	1928
GGA	G	25.47	1154
GGC	G	6.158	279
GGG	G	10.109	458
GGT	G	22.491	1019
CAC	H	5.628	255
CAT	H	20.129	912
ATA	I	30.127	1365
ATC	I	14.589	661
ATT	I	43.767	1983
AAA	K	41.317	1872
AAG	K	13.265	601
CTA	L	13.839	627
CTC	L	6.71	304
CTG	L	6.025	273
CTT	L	22.292	1010
TTA	L	34.497	1563
TTG	L	22.049	999
ATG	M	22.336	1012
AAC	N	10.528	477
AAT	N	38.58	1748
CCA	P	12.382	561
CCC	P	7.107	322
CCG	P	5.187	235
CCT	P	15.03	681
CAA	Q	28.648	1298
CAG	Q	8.233	373
AGA	R	17.635	799
AGG	R	6.467	293
CGA	R	13.353	605
CGC	R	3.311	150
CGG	R	4.061	184
CGT	R	12.757	578
AGC	S	4.679	212
AGT	S	15.141	686
TCA	S	16.465	746
TCC	S	11.587	525
TCG	S	6.93	314
TCT	S	22.115	1002
ACA	T	15.98	724
ACC	T	7.659	347
ACG	T	4.944	224
ACT	T	21.497	974
GTA	V	18.981	860
GTC	V	5.694	258
GTG	V	6.599	299
GTT	V	20.372	923
TGG	W	18.297	829
TAC	Y	6.577	298
TAT	Y	31.451	1425
TAA	*	3.487	158
TAG	*	2.185	99

## Sheet: TableS4
Table S4. SSR content of the Chloroplast Genome of Macrotyloma axillare.
type	length	start	end	loc	loc_type
A	10	3712	3721	petD_2-petD_1	Intron
A	13	3828	3840	petD_2-petD_1	Intron
T	11	4343	4353	petD_1-petB_2	IGS
TA	6	9890	9901	clpP_2-clpP_3	Intron
A	11	10141	10151	clpP_2-clpP_3	Intron
A	10	10347	10356	clpP_2-clpP_3	Intron
T	10	12591	12600	rps18	Gene
AT	8	13935	13950	psaJ-trnP-UGG	IGS
A	10	14430	14439	trnW-CCA-petG	IGS
T	13	16652	16664	psbJ-petA	IGS
T	15	19147	19161	cemA	Gene
T	11	22507	22517	accD-trnQ-UUG	IGS
A	10	22628	22637	accD-trnQ-UUG	IGS
A	15	23458	23472	trnQ-UUG-psbK	IGS
A	10	23832	23841	psbK-psbI	IGS
AT	6	24022	24033	psbK-psbI	IGS
A	10	24506	24515	trnS-GCU-trnG-UCC_1	IGS
A	10	24570	24579	trnS-GCU-trnG-UCC_1	IGS
TA	6	24918	24929	trnS-GCU-trnG-UCC_1	IGS
TA	6	26282	26293	trnR-UCU-atpA	IGS
T	10	30778	30787	atpH-atpI	IGS
A	10	30914	30923	atpH-atpI	IGS
T	10	32401	32410	rps2	Gene
T	11	34843	34853	rpoC2	Gene
T	11	34971	34981	rpoC2	Gene
T	13	39526	39538	rpoC1_2-rpoC1_1	Intron
T	10	42793	42802	rpoB	Gene
T	14	45143	45156	trnC-GCA-petN	IGS
A	12	46301	46312	psbM-trnD-GUC	IGS
T	11	47957	47967	trnE-UUC-trnT-GGU	IGS
T	11	48257	48267	trnT-GGU-psbD	IGS
T	10	48525	48534	trnT-GGU-psbD	IGS
A	10	52317	52326	trnS-UGA-psbZ	IGS
A	14	52763	52776	psbZ-trnG-GCC	IGS
A	10	53614	53623	trnfM-CAU-rps14	IGS
T	13	58873	58885	psaA-ycf3_3	IGS
A	10	59258	59267	psaA-ycf3_3	IGS
A	10	59553	59562	ycf3_3-ycf3_2	Intron
T	10	61412	61421	ycf3_1-trnS-GGA	IGS
A	12	61793	61804	trnS-GGA-rps4	IGS
A	10	63196	63205	trnT-UGU-trnL-UAA_1	IGS
A	11	63484	63494	trnT-UGU-trnL-UAA_1	IGS
T	12	64438	64449	trnL-UAA_2-trnF-GAA	IGS
T	10	65005	65014	trnF-GAA-ndhJ	IGS
T	14	68034	68047	trnV-UAC_1-trnM-CAU	IGS
T	10	70122	70131	atpB	Gene
T	14	70499	70512	atpB-rbcL	IGS
T	10	72745	72754	rbcL-trnK-UUU_1	IGS
T	16	73166	73181	rbcL-trnK-UUU_1	IGS
A	11	75267	75277	matK	Gene
T	10	77341	77350	psbA-trnH-GUG	IGS
T	16	79248	79263	rpl16_2-rpl16_1	Intron
T	10	79470	79479	rpl16_2-rpl16_1	Intron
A	12	90542	90553	ycf2-trnL-CAA	IGS
T	13	90738	90750	ycf2-trnL-CAA	IGS
A	10	91444	91453	trnL-CAA-ndhB_2	IGS
A	10	108629	108638	ycf1	Gene
A	11	109122	109132	ycf1	Gene
A	11	109349	109359	ycf1	Gene
A	10	110302	110311	ycf1	Gene
TA	6	116628	116639	ndhI-ndhG	IGS
A	10	121364	121373	ccsA-trnL-UAG	IGS
A	12	121607	121618	trnL-UAG-rpl32	IGS
T	10	139983	139992	ndhB_2-trnL-CAA	IGS
A	13	140686	140698	trnL-CAA-ycf2	IGS
T	12	140883	140894	trnL-CAA-ycf2	IGS
T	12	140883	140894	trnL-CAA-ycf2	IGS

## Sheet: TableS5
Table S5. SSR content of the Chloroplast Genome of Macrotyloma geocarpum.
type	length	start	end	loc	loc_type
A	12	501	512	rps8-rpl36	IGS
T	11	2818	2828	rpoA-petD_2	IGS
A	14	3831	3844	petD_2-petD_1	Intron
TA	6	9896	9907	clpP_2-clpP_3	Intron
A	12	10147	10158	clpP_2-clpP_3	Intron
AT	6	14196	14207	trnP-UGG-trnW-CCA	IGS
A	10	14422	14431	trnW-CCA-petG	IGS
T	19	16647	16665	psbJ-petA	IGS
T	12	19150	19161	cemA	Gene
T	11	19291	19301	cemA-ycf4	IGS
T	12	22482	22493	accD-trnQ-UUG	IGS
A	16	23424	23439	trnQ-UUG-psbK	IGS
A	14	24471	24484	trnS-GCU-trnG-UCC_1	IGS
A	10	24731	24740	trnS-GCU-trnG-UCC_1	IGS
TA	6	24886	24897	trnS-GCU-trnG-UCC_1	IGS
TA	6	26252	26263	trnR-UCU-atpA	IGS
T	10	30758	30767	atpH-atpI	IGS
A	11	30886	30896	atpH-atpI	IGS
T	10	32374	32383	rps2	Gene
T	11	34816	34826	rpoC2	Gene
T	11	34944	34954	rpoC2	Gene
T	12	39499	39510	rpoC1_2-rpoC1_1	Intron
T	10	42765	42774	rpoB	Gene
T	16	45124	45139	trnC-GCA-petN	IGS
A	10	46288	46297	psbM-trnD-GUC	IGS
T	12	47949	47960	trnE-UUC-trnT-GGU	IGS
T	11	48250	48260	trnT-GGU-psbD	IGS
T	10	48519	48528	trnT-GGU-psbD	IGS
A	10	48610	48619	trnT-GGU-psbD	IGS
A	10	52312	52321	trnS-UGA-psbZ	IGS
A	13	52758	52770	psbZ-trnG-GCC	IGS
T	14	58857	58870	psaA-ycf3_3	IGS
A	10	59248	59257	psaA-ycf3_3	IGS
A	17	63177	63193	trnT-UGU-trnL-UAA_1	IGS
A	10	63472	63481	trnT-UGU-trnL-UAA_1	IGS
T	10	64227	64236	trnL-UAA_2-trnF-GAA	IGS
T	10	64828	64837	trnF-GAA-ndhJ	IGS
T	13	67827	67839	trnV-UAC_1-trnM-CAU	IGS
T	10	69914	69923	atpB	Gene
T	11	70291	70301	atpB-rbcL	IGS
T	18	72951	72968	rbcL-trnK-UUU_1	IGS
A	11	75063	75073	matK	Gene
T	10	77130	77139	psbA-trnH-GUG	IGS
A	10	77915	77924	rpl14-rpl16_2	IGS
T	10	79033	79042	rpl16_2-rpl16_1	Intron
A	11	90341	90351	ycf2-trnL-CAA	IGS
T	14	90536	90549	ycf2-trnL-CAA	IGS
A	10	91247	91256	trnL-CAA-ndhB_2	IGS
A	10	108432	108441	ycf1	Gene
A	11	108925	108935	ycf1	Gene
A	11	109152	109162	ycf1	Gene
A	10	110105	110114	ycf1	Gene
TA	6	116438	116449	ndhI-ndhG	IGS
A	11	121169	121179	ccsA-trnL-UAG	IGS
A	10	121411	121420	trnL-UAG-rpl32	IGS
T	10	139785	139794	ndhB_2-trnL-CAA	IGS
A	14	140492	140505	trnL-CAA-ycf2	IGS
T	11	140690	140700	trnL-CAA-ycf2	IGS

## Sheet: TableS6
Table S6. SSR content of the Chloroplast Genome of Macrotyloma uniflorum.
type	length	start	end	loc	loc_type
T	11	2824	2834	rpoA-petD_2	IGS
A	11	3714	3724	petD_2-petD_1	Intron
A	13	3836	3848	petD_2-petD_1	Intron
T	11	4351	4361	petD_1-petB_2	IGS
TA	6	9905	9916	clpP_2-clpP_3	Intron
A	12	10156	10167	clpP_2-clpP_3	Intron
AT	8	13949	13964	psaJ-trnP-UGG	IGS
AT	6	14220	14231	trnP-UGG-trnW-CCA	IGS
A	10	14446	14455	trnW-CCA-petG	IGS
T	12	16674	16685	psbJ-petA	IGS
T	15	19168	19182	cemA	Gene
T	10	19588	19597	cemA-ycf4	IGS
T	11	22529	22539	accD-trnQ-UUG	IGS
A	11	22650	22660	accD-trnQ-UUG	IGS
A	14	23478	23491	trnQ-UUG-psbK	IGS
A	10	23851	23860	psbK-psbI	IGS
A	10	24525	24534	trnS-GCU-trnG-UCC_1	IGS
A	10	24589	24598	trnS-GCU-trnG-UCC_1	IGS
TA	6	24937	24948	trnS-GCU-trnG-UCC_1	IGS
TA	6	26301	26312	trnR-UCU-atpA	IGS
A	10	30937	30946	atpH-atpI	IGS
T	10	32424	32433	rps2	Gene
T	11	34866	34876	rpoC2	Gene
T	11	34994	35004	rpoC2	Gene
T	13	39549	39561	rpoC1_2-rpoC1_1	Intron
T	10	42816	42825	rpoB	Gene
T	14	45166	45179	trnC-GCA-petN	IGS
A	11	46324	46334	psbM-trnD-GUC	IGS
T	11	47979	47989	trnE-UUC-trnT-GGU	IGS
T	11	48279	48289	trnT-GGU-psbD	IGS
T	10	48547	48556	trnT-GGU-psbD	IGS
A	10	52339	52348	trnS-UGA-psbZ	IGS
A	14	52785	52798	psbZ-trnG-GCC	IGS
A	10	53636	53645	trnfM-CAU-rps14	IGS
T	13	58895	58907	psaA-ycf3_3	IGS
A	10	59279	59288	psaA-ycf3_3	IGS
A	10	59574	59583	ycf3_3-ycf3_2	Intron
T	10	61428	61437	ycf3_1-trnS-GGA	IGS
A	12	61809	61820	trnS-GGA-rps4	IGS
A	10	63212	63221	trnT-UGU-trnL-UAA_1	IGS
A	10	63500	63509	trnT-UGU-trnL-UAA_1	IGS
T	12	64453	64464	trnL-UAA_2-trnF-GAA	IGS
T	10	65014	65023	trnF-GAA-ndhJ	IGS
T	14	68038	68051	trnV-UAC_1-trnM-CAU	IGS
T	10	70126	70135	atpB	Gene
T	14	70503	70516	atpB-rbcL	IGS
T	18	73154	73171	rbcL-trnK-UUU_1	IGS
A	11	75257	75267	matK	Gene
T	10	77331	77340	psbA-trnH-GUG	IGS
A	10	78121	78130	rpl14-rpl16_2	IGS
T	16	79239	79254	rpl16_2-rpl16_1	Intron
T	10	79461	79470	rpl16_2-rpl16_1	Intron
A	12	90545	90556	ycf2-trnL-CAA	IGS
T	13	90741	90753	ycf2-trnL-CAA	IGS
A	10	91452	91461	trnL-CAA-ndhB_2	IGS
A	10	108637	108646	ycf1	Gene
A	11	109130	109140	ycf1	Gene
A	11	109357	109367	ycf1	Gene
A	10	110310	110319	ycf1	Gene
TA	6	116636	116647	ndhI-ndhG	IGS
A	12	121614	121625	trnL-UAG-rpl32	IGS
T	10	139990	139999	ndhB_2-trnL-CAA	IGS
A	13	140698	140710	trnL-CAA-ycf2	IGS
T	12	140895	140906	trnL-CAA-ycf2	IGS
