# Supplementary material for: Characterisation of the Chloroplast Genome of Macrotyloma Species: Comparative Analysis and Phylogenomic Insights
Source: Research Square preprint supplement (doi:10.21203/rs.3.rs-8730534/v1), 2026-02-10
Supplement: Supplementary file 1 [file 38ca284be1f80fdff8203ef7.docx]

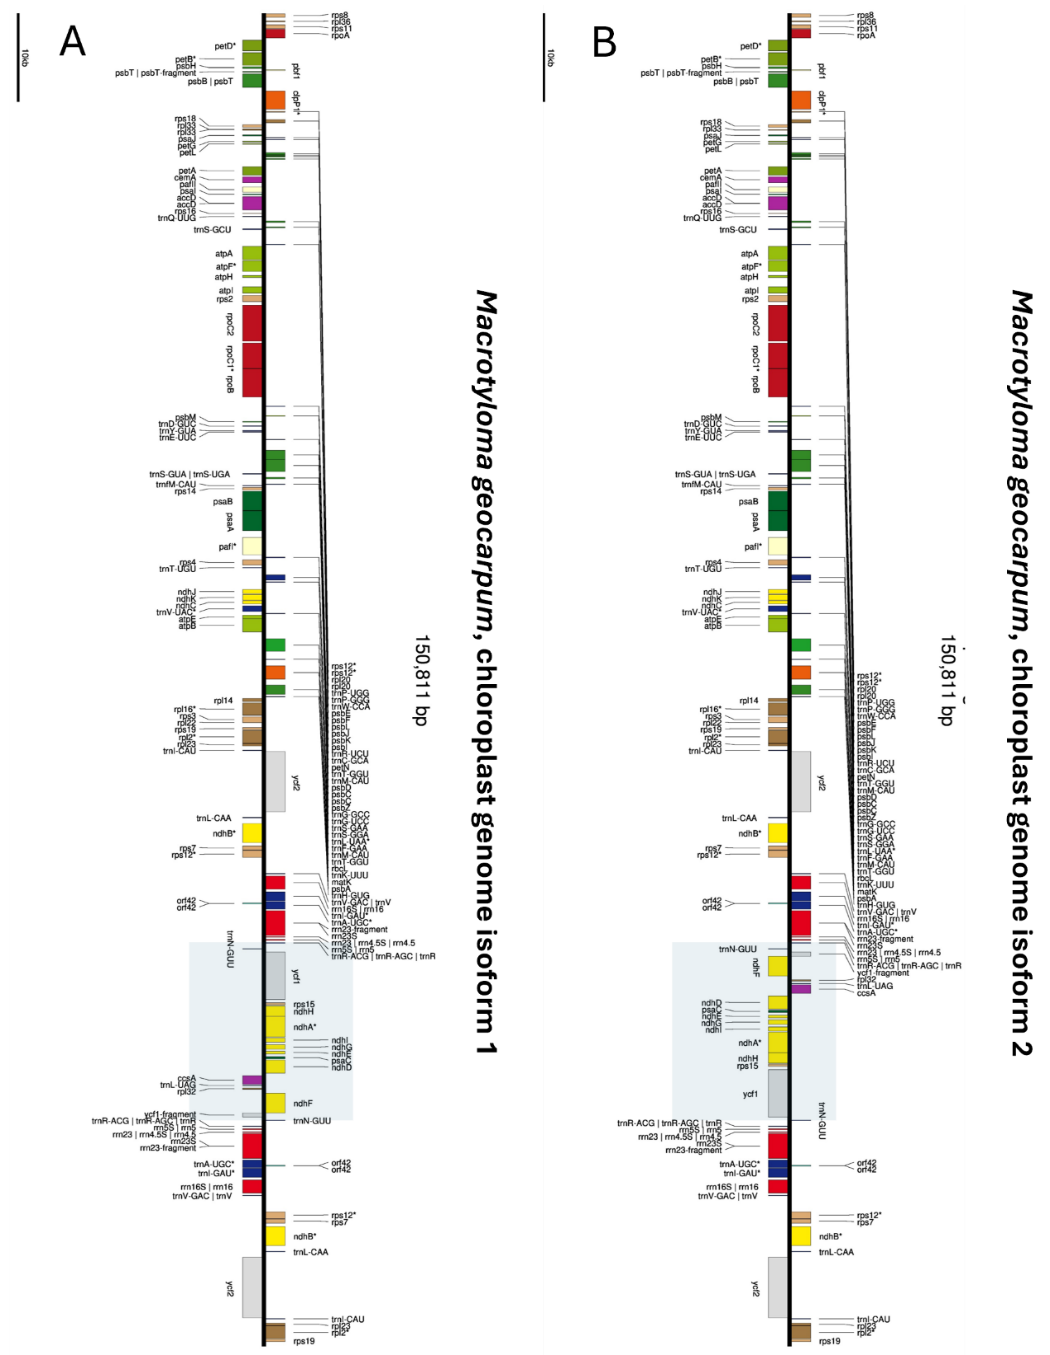


**Figure S1. Linear representation of two isoforms of the chloroplast genome of the *Macrotyloma* *geocarpum*:** Linear gene maps of the complete chloroplast genomes of the Macrotyloma *grocarpum* are shown, with each species represented by two alternative structural isoforms (A-B). The two isoforms within each species differ only in the orientation of the small single-copy (SSC) region, reflecting the well-known flip-flop recombination between inverted repeat (IR) regions
